# Supplementary material
Source: Research Square preprint supplement (doi:10.21203/rs.3.rs-8913230/v1)
Supplement: Supplementary file 1 [file 34601b674a031676edb0c6e5.xlsx]

## Sheet: Table_linreg_odds_A_Wisconsin_H
Linear regressions
multiplex Ig binding vs birth year with covariates (binding ~ year_of_birth + sex + vax_history + vax_types)
A_Wisconsin_H1N1_HA.2019	unscaled		scaled
Characteristic	Beta	Beta 95% CI	Beta	Beta 95% CI	Odds ratio	Odds 95% CI	p-value
year_of_birth	110	-29, 250	0.17	-0.05, 0.39	NA	NA	0.12	ns
sex (0 female, 1 male)	5664	2,672, 8,657	0.61	0.29, 0.93	1.83206	1.33, 2.52	<0.001	***
vax_history
always	NA	NA	NA	NA	NA	NA	NA
inconsistent	7234	3,683, 10,784	0.77	0.39, 1.2	2.16658	1.48, 3.17	<0.001	***
never	2007	-3,845, 7,860	0.21	-0.41, 0.84	1.23928	0.66, 2.32	0.5	ns
vax_types
cell	NA	NA	NA	NA	NA	NA	NA
cell_high_dose	9387	-3,204, 21,978	1	-0.34, 2.3	2.72738	0.71, 10.48	0.15	ns
egg	2562	-1,415, 6,538	0.27	-0.15, 0.70	1.31497	0.86, 2.01	0.2	ns
egg_adjuvanted	2116	-2,671, 6,903	0.23	-0.29, 0.74	1.25383	0.75, 2.09	0.4	ns
egg_high_dose	6342	629, 12,056	0.68	0.07, 1.3	1.96974	1.07, 3.63	0.031	*
A_Japan_H2N2_HA.1957	unscaled		scaled
Characteristic	Beta	Beta 95% CI	Beta	Beta 95% CI	Odds ratio	Odds 95% CI	p-value
year_of_birth	-133	-253, -12	-0.21	-0.39, -0.02	NA	NA	0.033	*
sex (0 female, 1 male)	3890	1,304, 6,475	0.41	0.14, 0.68	1.50888	1.15, 1.98	0.004	***
vax_history
always	NA	NA	NA	NA	NA	NA	NA
inconsistent	2694	-374, 5,762	0.28	-0.04, 0.61	1.32963	0.96, 1.84	0.088	ns
never	418	-4,640, 5,475	0.04	-0.49, 0.58	1.04516	0.61, 1.78	0.9	ns
vax_types
cell	NA	NA	NA	NA	NA	NA	NA
cell_high_dose	5315	-5,565, 16,196	0.56	-0.59, 1.7	1.75444	0.56, 5.54	0.3	ns
egg	1909	-1,527, 5,346	0.2	-0.16, 0.57	1.22374	0.85, 1.76	0.3	ns
egg_adjuvanted	2115	-2,022, 6,252	0.22	-0.21, 0.66	1.25068	0.81, 1.94	0.3	ns
egg_high_dose	12499	7,562, 17,436	1.3	0.80, 1.8	3.7506	2.23, 6.32	<0.001	***
A_HongKong_H3N2_HA.1968	unscaled		scaled
Characteristic	Beta	Beta 95% CI	Beta	Beta 95% CI	Odds ratio	Odds 95% CI	p-value
year_of_birth	-314	-470, -159	-0.42	-0.63, -0.21	NA	NA	<0.001	***
sex (0 female, 1 male)	6018	2,688, 9,348	0.55	0.24, 0.85	1.72664	1.28, 2.34	<0.001	***
vax_history
always	NA	NA	NA	NA	NA	NA	NA
inconsistent	6762	2,811, 10,714	0.61	0.26, 0.97	1.84736	1.29, 2.64	0.001	***
never	7715	1,202, 14,229	0.7	0.11, 1.3	2.01427	1.12, 3.64	0.022	*
vax_types
cell	NA	NA	NA	NA	NA	NA	NA
cell_high_dose	12465	-1,547, 26,478	1.1	-0.14, 2.4	3.09995	0.87, 11.06	0.084	ns
egg	5457	1,031, 9,883	0.5	0.09, 0.90	1.64098	1.1, 2.45	0.017	*
egg_adjuvanted	2805	-2,523, 8,132	0.25	-0.23, 0.74	1.28989	0.8, 2.09	0.3	ns
egg_high_dose	1551	-4,807, 7,910	0.14	-0.44, 0.72	1.15121	0.65, 2.05	0.6	ns
A_Florida_bald_eagle_H5N1_HA.2022	unscaled		scaled
Characteristic	Beta	Beta 95% CI	Beta	Beta 95% CI	Odds ratio	Odds 95% CI	p-value
year_of_birth	-73	-133, -12	-0.23	-0.43, -0.04	NA	NA	0.02	*
sex (0 female, 1 male)	3451	2,155, 4,746	0.75	0.47, 1.0	2.12711	1.6, 2.82	<0.001	***
vax_history
always	NA	NA	NA	NA	NA	NA	NA
inconsistent	2247	709, 3,784	0.49	0.16, 0.83	1.63469	1.17, 2.29	0.005	**
never	1466	-1,068, 4,000	0.32	-0.23, 0.87	1.37812	0.79, 2.4	0.3	ns
vax_types
cell	NA	NA	NA	NA	NA	NA	NA
cell_high_dose	4509	-942, 9,961	0.99	-0.21, 2.2	2.68145	0.81, 8.84	0.11	ns
egg	1527	-195, 3,249	0.33	-0.04, 0.71	1.39649	0.96, 2.04	0.085	ns
egg_adjuvanted	1703	-369, 3,776	0.37	-0.08, 0.83	1.45148	0.92, 2.28	0.11	ns
egg_high_dose	2825	351, 5,299	0.62	0.08, 1.2	1.85512	1.08, 3.19	0.027	*
A_Vietnam_H5N1_HA.2004	unscaled		scaled
Characteristic	Beta	Beta 95% CI	Beta	Beta 95% CI	Odds ratio	Odds 95% CI	p-value
year_of_birth	-36	-142, 71	-0.07	-0.28, 0.14	NA	NA	0.5	ns
sex (0 female, 1 male)	5158	2,884, 7,432	0.68	0.38, 0.98	1.97554	1.46, 2.67	<0.001	***
vax_history
always	NA	NA	NA	NA	NA	NA	NA
inconsistent	2030	-668, 4,728	0.27	-0.09, 0.62	1.30727	0.92, 1.87	0.14	ns
never	-293	-4,740, 4,154	-0.04	-0.63, 0.55	0.962078	0.53, 1.73	0.9	ns
vax_types
cell	NA	NA	NA	NA	NA	NA	NA
cell_high_dose	11758	2,190, 21,326	1.6	0.29, 2.8	4.72057	1.34, 16.69	0.017	*
egg	2758	-264, 5,780	0.36	-0.03, 0.76	1.43914	0.97, 2.14	0.076	ns
egg_adjuvanted	2263	-1,374, 5,901	0.3	-0.18, 0.78	1.34812	0.83, 2.18	0.2	ns
egg_high_dose	7256	2,915, 11,598	0.96	0.38, 1.5	2.60592	1.47, 4.62	0.001	***
A_Florida_bald_eagle_H5N1_NA.2022	unscaled		scaled
Characteristic	Beta	Beta 95% CI	Beta	Beta 95% CI	Odds ratio	Odds 95% CI	p-value
year_of_birth	335	221, 449	0.56	0.37, 0.76	NA	NA	<0.001	***
sex (0 female, 1 male)	1827	-615, 4,270	0.21	-0.07, 0.49	1.23279	0.93, 1.63	0.15	ns
vax_history
always	NA	NA	NA	NA	NA	NA	NA
inconsistent	-1827	-4,726, 1,071	-0.21	-0.54, 0.12	0.811141	0.58, 1.13	0.2	ns
never	-3320	-8,097, 1,457	-0.38	-0.93, 0.17	0.683682	0.4, 1.18	0.2	ns
vax_types
cell	NA	NA	NA	NA	NA	NA	NA
cell_high_dose	1723	-8,554, 12,000	0.2	-0.98, 1.4	1.21815	0.38, 3.95	0.7	ns
egg	4575	1,329, 7,821	0.52	0.15, 0.90	1.68869	1.16, 2.45	0.007	**
egg_adjuvanted	5969	2,062, 9,877	0.68	0.24, 1.1	1.98119	1.27, 3.1	0.003	***
egg_high_dose	3529	-1,134, 8,193	0.4	-0.13, 0.94	1.49814	0.88, 2.56	0.14	ns
B_Phuket_Yamagata_lineage_HA.2013	unscaled		scaled
Characteristic	Beta	Beta 95% CI	Beta	Beta 95% CI	Odds ratio	Odds 95% CI	p-value
year_of_birth	245	131, 360	0.43	0.23, 0.63	NA	NA	<0.001	***
sex (0 female, 1 male)	5607	3,159, 8,055	0.67	0.38, 0.96	1.94723	1.46, 2.6	<0.001	***
vax_history
always	NA	NA	NA	NA	NA	NA	NA
inconsistent	6767	3,863, 9,672	0.8	0.46, 1.1	2.23514	1.58, 3.16	<0.001	***
never	6368	1,580, 11,155	0.76	0.19, 1.3	2.13143	1.21, 3.77	0.01	*
vax_types
cell	NA	NA	NA	NA	NA	NA	NA
cell_high_dose	3738	-6,562, 14,037	0.44	-0.78, 1.7	1.55927	0.46, 5.3	0.5	ns
egg	2985	-268, 6,237	0.35	-0.03, 0.74	1.42577	0.97, 2.1	0.075	ns
egg_adjuvanted	2738	-1,178, 6,654	0.33	-0.14, 0.79	1.3846	0.87, 2.21	0.2	ns
egg_high_dose	7309	2,635, 11,982	0.87	0.31, 1.4	2.38368	1.37, 4.15	0.003	***
