# Supplementary material
Source: Research Square preprint supplement (doi:10.21203/rs.3.rs-8913230/v1)
Supplement: Supplementary file 2 [file b694ba67fd523ac9e994ecbd.xlsx]

## Sheet: Sheet1
ID	DEMOGRAPHICS					ILLNESS HISTORY						VACCINE HISTORY						VACCINE INFORMATION						SUBSTANCE USE		VACCINATION VISIT INFORMATION
	AGE	SEX	RACE	ETHNICITY	BMI	Previous Influenza Infection	Lab Confirmed	Severity	Infection Year	Treatment Received	Notes	2016/17	2017/18	2018/2019	2019/20	2020/21	Vax History Group	Year 1 Brand	Year 1 Vax Type	Year 2 Brand	Year 2 Vax Type	Year 3 Brand	Year 3 Vax Type	Alcohol	Tobacco	Year 1, Visit 1 -> 2 interval (d)	Vax -> Visit Interval (d)	Year 2, Visit 1 -> 2 interval (d)	Vax -> Visit Interval (d)	Year 3, Visit 1 -> 2 interval (d)	Vax -> Visit Interval (d)
1	20-29	Female	White or Caucasian	Non-Hispanic	23.68	No	-	-	-	-	-	No	No	No	Yes	Yes	INCON	GSK Biologicals	Egg	GSK Biologicals	Egg	GSK Biologicals	Egg	No	No	-	-	40	28	30	28
2	70-79	Male	White or Caucasian	Non-Hispanic	27.78	Yes	Yes	Moderate	2019	Hospitalized (10 days)	Did not receive flu vaccine that year	-	-	-	No	No	INCON	Sanofi Pasteur [HIGH DOSE]	Egg	Seqirus [ADJ]	Egg	Seqirus [ADJ]	Egg	Yes	No	42	35	35	21	21	21
3	70-79	Female	White or Caucasian	Non-Hispanic	28.01	Yes Yes	-	Severe Severe	1990 1960	-	Did not receive flu vaccine that year (1900?) -	Yes	Yes	Yes	Yes	Yes	ALWAYS	Sanofi Pasteur [HIGH DOSE]	Egg	Sanofi Pasteur [HIGH DOSE]	Egg	Sanofi Pasteur [HIGH DOSE]	Egg	Yes	No	-	36	68	40	21	20
4	60-69	Female	White or Caucasian	Non-Hispanic	22.09	Yes Yes	-	-	1981 Can't recall	-	Not vaccinated for flu that year (1981) -	-	-	-	-	-	NEVER	Seqirus	-	Seqirus	Cell	Seqirus	Cell	Yes	Former	50	27	57	39	27	21
5	60-69	Male	Black or African-American and White or Caucasian	Unspecified	30.52	No	-	-	-	-	-	No	No	No	No	No	NEVER	-	-	Sanofi Pasteur [HIGH DOSE]	Egg	Seqirus [ADJ]	Egg	No	No	65	20	54	34	19	19
6	60-69	Male	Black or African-American	Unspecified	27.31	No	-	-	-	-	-	Yes	Yes	Yes	Yes	Yes	ALWAYS	Seqirus	-	GSK Biologicals	Egg	Seqirus	Cell	No	No	-	30	55	19	36	30
7	40-49	Female	White or Caucasian	Non-Hispanic	29.39	Possible	-	Moderate	Can't recall	-	Not vaccinated that year, traveled abroad	No	No	No	No	Yes	INCON	Seqirus	-	GSK Biologicals	Egg	Seqirus	Cell	No	No	29	28	56	30	21	21
8	40-49	Male	White or Caucasian	Non-Hispanic	25.31	No	-	-	-	-	-	Yes	Yes	Yes	Yes	Yes	ALWAYS	GSK Biologicals	Egg	Seqirus [ADJ]	Egg	Seqirus	Cell	Yes	No	39	28	34	33	22	21
9	70-79	Female	White or Caucasian	Non-Hispanic	24.45	No	-	-	-	-	-	-	-	-	-	-	NEVER	Seqirus	-	Sanofi Pasteur [HIGH DOSE]	Egg	Seqirus [ADJ]	Egg	Former	Former	28	28	57	35	27	27
10	60-69	Male	Black or African-American	Non-Hispanic	25.24	Yes	No	-	2016	-	Suspected infection in 2016	-	-	-	-	-	NEVER	Sanofi Pasteur	Egg	Sanofi Pasteur	Egg	Seqirus [ADJ]	Egg	Never	Former	26	23	119	98	20	19
11	50-59	Male	White or Caucasian	Non-Hispanic	28.31	Yes	No	-	2015	-	Confirmed had flu 6-7 years ago; drowsiness, nausea, cough and stuffy nose for less then a week; vaccinated that year	Yes	Yes	Yes	Yes	Yes	ALWAYS	-	-	Seqirus [ADJ]	Egg	Sanofi Pasteur	Egg	-	No	35	34	70	44	27	22
12	60-69	Male	Black or African-American	Non-Hispanic	32.66	-	-	-	-	-	-	-	-	-	Yes	-	INCON	-	-	Seqirus [ADJ]	Egg	GSK Biologicals	Egg	-	-	46	28	34	26	20	19
13	20-29	Male	Other	Hispanic	32.01	No	-	-	-	-	-	Yes	Yes	Yes	-	Yes	INCON	-	-	-		Seqirus	Cell	Yes	No	66	36	135	135	-	44
14	40-49	Female	White or Caucasian	Non-Hispanic	23.81	Yes Yes	Yes -	-	2012 -	Care in hospital, received oxygen -	Flu type A in 2012 (flu type A); trouble breathing, nausea and vomiting, coughing, congestion Suspected flu before 2012 but unconfirmed	Yes	Yes	Yes	Yes	Yes	ALWAYS	GSK Biologicals	Egg	Seqirus	Cell	GSK Biologicals	Egg	Yes	Former	48	35	94	94	38	37
15	40-49	Female	Black or African-American	Non-Hispanic	30.82	Yes	-	-	2003	Nyquil OTC	Chills, body aches, fever, runny nose; felt like an extreme cold	N/A	Yes	Yes	Yes	Yes	INCON	Seqirus	-	Seqirus [ADJ]	Egg	GSK Biologicals	Egg	No	Former	21	20	35	26	28	20
16	30-39	Female	Black or African-American	Non-Hispanic	30.03	No	-	-	-	-	-	-	-	-	-	-	NEVER	Sanofi Pasteur	Egg	Seqirus	Cell	Seqirus	Cell	Former	Yes	27	23	35	30	22	19
17	60-69	Female	White or Caucasian	Non-Hispanic	26.8	No	-	-	-	-	-	Yes	Yes	Yes	Yes	Yes	ALWAYS	Seqirus	-	Seqirus	Cell	Sanofi Pasteur [HIGH DOSE]	Egg	Yes	No	38	28	27	19	-	20
18	70-79	Male	Black or African-American	Non-Hispanic	33.39	No	-	-	-	-	-	-	-	-	-	-	NEVER	Sanofi Pasteur [HIGH DOSE]	Egg	Sanofi Pasteur [HIGH DOSE]	Egg	Sanofi Pasteur [HIGH DOSE]	Egg	Former	Yes	42	37	45	41	23	20
19	30-39	Male	Black or African-American	Non-Hispanic	39.8	No	-	-	-	-	-	-	-	-	-	-	NEVER	-	-	Seqirus	-	Seqirus [ADJ]	Egg	Yes	Former	34	24	55	47	-	33
20	30-39	Male	Asian	Non-Hispanic	26.22	Yes Yes	-	-	2013 2018	-	-	Yes	Yes	Yes	Yes	Yes	ALWAYS	GSK Biologicals	Egg	GSK Biologicals	Egg	Sanofi Pasteur	Egg	Yes	No	-	38	46	21	22	21
21	30-39	Male	White or Caucasian	Hispanic	27.38	Possible Possible	-	-	-	-	-	No	Yes	Yes	Yes	No	INCON	GSK Biologicals	Egg	Seqirus	Cell	Seqirus	Cell	Former	No	69	35	30	29	44	39
22		Male	Black or African-American	Non-Hispanic	23.84	No	-	-	-	-	-	-	No	No	No	No	NEVER	-	-	Seqirus	Cell	Seqirus	Cell	Yes	Yes	29	25	27	19	20	20
23	70-79	Female	White or Caucasian	Non-Hispanic	29.89	No	-	-	-	-	-	-	-	-	-	-	NEVER	-	-	Sanofi Pasteur [HIGH DOSE]	Egg	Seqirus [ADJ]	Egg	Former	Former	-	-	25	9	31	19
24	70-79	Female	White or Caucasian	Non-Hispanic	24.17	Yes	-	Moderate	2021	-	-	No	No	No	No	No	NEVER	Seqirus	-	Sanofi Pasteur [HIGH DOSE]	Egg	Seqirus [ADJ]	Egg	Yes	No	32	28	54	30	33	33
25	30-39	Female	White or Caucasian	Non-Hispanic	26.63	Yes	-	-	1997	-	-	No	No	Yes	Yes	No	INCON	Sanofi Pasteur	Egg	-	-	Seqirus	Cell	Yes	No	38	35	131	113	81	26
26	60-69	Female	White or Caucasian	Non-Hispanic	21.87	Yes	-	Severe	2018	Tylenol, cold medicine	-	-	Yes	No	No	No	INCON	Sanofi Pasteur [HIGH DOSE]	Recombinant	Sanofi Pasteur [HIGH DOSE]	Egg	Seqirus [ADJ]	Egg	Yes	Former	49	28	98	32	42	41
27	50-59	Female	Other - Puerto Rican	Hispanic	36.03	No	-	-	-	-	-	No	No	No	No	No	NEVER	Sanofi Pasteur	Egg	Seqirus [ADJ]	Egg	Seqirus	Cell	Yes	Yes	31	25	43	27	21	20
28	50-59	Female	Black or African-American	Non-Hispanic	31	No	-	-	-	-	-	No	No	No	No	No	NEVER	GSK Biologicals	Egg	GSK Biologicals	Egg	Sanofi Pasteur	Egg	Former	No	31	28	63	32	46	23
29	50-59	Female	White or Caucasian	Non-Hispanic	23.54	No	-	-	-	-	-	No	Yes	No	Yes	Yes	INCON	Seqirus	-	Seqirus [ADJ]	Egg	Seqirus	Egg	Yes	No	34	29	94	71	42	27
30	50-59	Female	White or Caucasian	Non-Hispanic	38.21	No	-	-	-	-	-	-	No	No	No	No	NEVER	GSK Biologicals	Egg	-	-	Seqirus	Cell	Yes	No	30	30	36	27	26	25
