# Supplementary material
Source: Research Square preprint supplement (doi:10.21203/rs.3.rs-8913230/v1)
Supplement: Supplementary file 3 [file e27a7ab88cfcce08355c4e35.xlsx]

## Sheet: Sheet1
	ID	#Inf_1	#Inf_2	#Inf_3	#Inf_4	#Inf_5
DEMOGRAPHIC INFORMATION (@ ENROLLMENT)	age range	30-39	50-59	60-69	30-39	40-49
	sex	Female	Male	Male	Male	Female
	race	White or Caucasian	White or Caucasian	White or Caucasian	White or Caucasian	na
	ethnicity	NonnaHispanic	NonnaHispanic	NonnaHispanic	Hispanic	Hispanic
	BMI	35	34	23	32	21
ILLNESS VISIT INFORMATION	flu illness visit	Year 2 (2022/2023)	Year 2 (2022/2023)	Year 3 (2023/2024)	Year 3 (2023/2024)	Year 3 (2023/2024)
	confirmed flu (month/year)	2022-10-04	2022-12-14	2023-10-30	2023-12-24	2023-11-14
	2nd flu illness visit	na	na	Year 3 (2023/2024)	na	na
	2nd confirmed flu (month/year)	na	na	2024-01-04	na	na
	virus type/subtype	Influenza A	Inflenza A H1N1 2009	Influenza A; Influenza A	Influenza A	Influenza A
	testing location	Outside	NYULH	Outside; Outside	Outside	NYULH
	other diagnoses	na	na	COVID-19	na	na
ILLNESS HISTORY	previous influenza infection	Yes	Yes	No	No	Yes
	lab-confirmed	na	Yes	na	na	No
	severity	Moderate	Moderate	na	na	Moderate
	infection year	within 10 years before study start	2011	na	na	2010
	treatment	Tamiflu	na	na	na	na
VACCINE HISTORY	2016/17 vaccination	No	na	na	na	na
	2017/18 vaccination	No	No	No	No	na
	2018/2019 vaccination	No	No	No	No	No
	2019/20 Vaccinaton	No	No	No	Yes	No
	2020/21 vaccination	No	Yes	No	Yes	No
	vax history group	Never	Inconsistent	Never	Inconsistent	Inconsistent
VACCINE INFORMATION	year 1 brand	na	Sanofi Pasteur	na	na	na
	year 1 vax type	na	Egg	na	na	na
	year 2 brand	na	Sequirus	Seqirus [adj]	GSK Biologicals	na
	year 2 vax type	na	Cell	Egg	Egg	na
	year 3 brand	na	Seqirus [adj]	Seqirus [adj]	Seqirus	Sequirus
	year 3 vax type	na	Egg	Egg	Cell	Cell
