# Supplementary material
Source: Research Square preprint supplement (doi:10.21203/rs.3.rs-8913230/v1)
Supplement: Supplementary file 4 [file e90c7a3166cecdd20ffefede.xlsx]

## Sheet: Antigens & Bead Regions
#	Antigen name	Antigen details	Vaccine Year	Company	Product Name	Product Number	Bead Region	Coupling Concentration
1	A/Wisconsin/588/2019; A/Victoria/2570/2020 (H1) HA	Annual Vaccine	1, 2	Sino Biological	Influenza A H1N1 (A/Wisconsin/588/2019)/(A/Victoria/2570/2019) Hemagglutinin/HA Protein (His Tag)	40787-V08H	72	10 pmol
2	A/Cambodia/e0826360/2020 (H3) HA	Annual Vaccine	1	Sino Biological	Influenza A H3N2 (A/Cambodia/e0826360/2020) Hemagglutinin/HA (His Tag)	40789-V08H	67	10 pmol
3	B/Washington/02/2019 (Victoria lineage) HA	Annual Vaccine	1	Sino Biological	Influenza B (B/Washington/02/2019) Hemagglutinin/HA Protein (His Tag)	40722-V08H	63	10 pmol
4	B/Phuket/3073/2013 (Yamagata lineage) HA	Annual Vaccine	1, 2, 3	Sino Biological	Influenza B (B/Phuket/3073/2013) Hemagglutinin/HA Protein (His Tag)	404948-V08B	47	10 pmol
5	A/Darwin/9/2021 (H3) HA	Annual Vaccine	2, 3	Sino Biological	Influenza A H3N2 (A/Darwin/9/2021) Hemagglutinin/HA Protein (ECD, His Tag)	40859-V08H	44	10 pmol
6	B/Austria/1359417/2021 (Victoria lineage) HA	Annual Vaccine	2, 3	Sino Biological	Influenza B (B/Austria/1359417/2021) Humagglutinin/HA Protein (ECD, His Tag)	40862-V08H	26	10 pmol
7	A/Victoria/4897/2022 (H1) HA	Annual Vaccine	3	Sino Biological	Influenza A H1N1 (A/Victoria/4897/2022) Hemagglutinin/HA Protein (ECD, His Tag)	40938-V08H	12	10 pmol
8	A/Brevig Mission/1/1918 (H1) HA	1918 Pandemic	N/A	Sino Biological	Influenza A H1N1 (A/Brevig Mission/1/1918) Hemagglutinin/HA protein (His Tag)	11068-V08H	14	10 pmol
9	A/Japan/305/1957 (H2) HA	1957 Pandemic	N/A	Sino Biological	Influenza A H2N2 (A/Japan/205/1957) Hemagglutinin/HA Protein (His Tag)	11088-V08H	18	10 pmol
10	A/Hong Kong/1/1968 (H3) HA	1968 Pandemic	N/A	Sino Biological	Influenza A H3N2 (A/Hong.Kong/1/1968) Hemagglutinin / HA Protein (His Tag)	40715-V08H-100	20	10 pmol
11	A/California/04/2009 (H1) HA	2009 Pandemic	N/A	Sino Biological	Influenza A H1N1 (A/California/04/2009) Hemagglutinin / HA Protein (His Tag)	11055-V08H-100	22	10 pmol
12	A/Michigan/45/2015 (H1) HA	mRNA HA vaccine	N/A	Sino Biological	Influenza A H1N1 (A/Michigan/45/2015) Hemagglutinin / HA Protein (His Tag)	40567-V08H1-100	29	10 pmol
13	A/Vietnam/1194/2004 (H5) HA	mRNA HA vaccine	N/A	Sino Biological	Influenza A H5N1 (A/Vietnam/1194/2004) Hemagglutinin / HA Protein (His Tag)	11062-V08H1-100	36	10 pmol
14	A/Shanghai/1/2013 (H7) HA	mRNA HA vaccine	N/A	Sino Biological	Influenza A H7N9 (A/Shanghai/1/2013) Hemagglutinin/HA Protein (His Tag)	40104-V08H	39	10 pmol
15	A/bald eagle/Florida/W22-134-OP/2022 (H5) HA	Bird/Cattle Outbreak (Clade 2.3.4.4b)	N/A	BEI Resources	H5 Hemagglutinin (HA) Protein from Influenza A Virus, A/bald eagle/Florida/W22-134-OP/2022 (H5N1), Recombinant from Baculovirus	NR-59424	19	50 pmol
16	A/Wisconsin/588/2019; A/Victoria/2570/2020 (N1) NA	Annual Vaccine	1, 2	Sino Biological	Influenza A H1N1 (A/Wisconsin/588/2019) / (A/Victoria/2570/2019) Neuraminidase / NA Protein (His Tag)	40785-V08B-100	42	10 pmol
17	A/Cambodia/e0826360/2020 (N2) NA	Annual Vaccine	1	Sino Biological	Influenza A H3N2 (A/Cambodia/e0826360/2020) Hemagglutinin / HA Protein (His Tag)	40789-V08H-100	52	10 pmol
18	B/Washington/02/2019 (Victoria lineage) NA	Annual Vaccine	1	Sino Biological	Influenza B (B/Washington/02/2019) Neuraminidase / NA (His Tag)	40790-V08B-100	55	10 pmol
19	B/Phuket/3073/2013 (Yamagata lineage) NA	Annual Vaccine	1, 2, 3	Sino Biological	Influenza B (B/PHUKET/3073/2013) Hemagglutinin / HA Protein (His Tag)	40498-V08B-100	58	10 pmol
20	A/Darwin/9/2021 (N2) NA	Annual Vaccine	2, 3	Sino Biological	Influenza A H3N2 (A/Darwin/9/2021) Hemagglutinin / HA Protein (ECD, His Tag)	40859-V08B-100	61	10 pmol
21	B/Austria/1359417/2021 (Victoria lineage) NA	Annual Vaccine	2, 3	Sino Biological	Influenza B (B/Austria/1359417/2021) Neuraminidase / NA Protein (ECD, His Tag)	40863-V08B-100	65	10 pmol
22	A/Victoria/4897/2022 (N1) NA	Annual Vaccine	3	Sino Biological	Influenza A H1N1 (A/Victoria/4897/2022) Hemagglutinin / HA Protein (ECD, His Tag)	40938-V08H-100	80	10 pmol
23	A/bald eagle/Florida/W22-134-OP/2022 (N1) NA	Bird/Cattle Outbreak (Clade 2.3.4.4b)	N/A	BEI Resources	N1 Neuraminidase (NA) Protein from Influenza A Virus, A/bald eagle/Florida/W22-134-OP/2022 (H5N1), Recombinant from Baculovirus	NR-59923	15	100 pmol
24	BSA	Control	N/A	Fisher Scientific	Bovine Serum Albumin (BSA), Cohn Fraction V, 98%, for cell culture, low Endotoxin, Alfa Aesar	AAJ6509722	33	10 pmol
25	Rubella E1/E2	Control	N/A	Acro Biosystems	Rubella virus Glycoprotein E2 & E1 (strain M33) (RUBV), His Tag&Strep II Tag (MALS verified) (discontinued; switch to ProSci #24-974)	GL2-R5583	74	10 pmol
26	Blank - IC45 (auto-fluorescing beads)	Control	N/A	Luminex	MagPlex® RP1 Monitor	MRP1-045-01	45	N/A

## Sheet: Antibodies
Intended Detection	Company	Product Name	Product Number	Lot Number (ON BOTTLE)	Starting Concentration (ON BOTTLE)	Reaction Concentration
IgG1	Abcam	Rabbit monoclonal [H26-10] Anti-Human IgG1 H&L (Biotin)	ab201485	1001013793	0.623 mg/mL	4 µg/mL
IgG2	Southern Biological	Mouse Anti-Human IgG2 Fc-BIOT	9060-08	G0321-T071D	0.5 mg/mL	4 µg/mL
IgG3	Southern Biological	Mouse Anti-Human IgG3 Hinge-BIOT	9210-08	D0720-S611D	0.5 mg/mL	0.5 µg/mL
IgG4	BD Pharmingen	Biotin Mouse Anti-Human IgG4	555882	2075786	0.5 mg/mL	2 µg/mL
IgA1	Southern Biological	Mouse Anti-Human IgA1-BIOT	9130-08	D2821-XC81G	0.5 mg/mL	0.5 µg/mL
IgA2	Southern Biological	Mouse Anti-Human IgA2-BIOT	9140-08	B0719-WE71F	0.5 mg/mL	0.5 µg/mL
IgM	BioLegend	Biotin anti-human IgM Clone MHM-88	314504	B375461	0.5 mg/mL	2 µg/mL
Total Ig	Abcam	Rabbit Anti-Human IgG H&L (Biotin). Polyclonal.	ab97158	1024036-1	1 mg/mL	2 µg/mL
Total IgG	Jackson Immuno	Biotin-SP Affinipure Donkey Anti-Human IgG, Fcy fragment specific	709-065-098	170827	1.1 mg/mL	1 ug/mL
Total IgA	Jackson Immuno	Biotin-SP Affinipure Goat Anti-Human Serum IGA, α chain specific	109-065-011	164785	1.4 mg/mL	0.1 ug/mL
